# Supplementary material
Source: PubMed Central journal article supplement (PMC8319810)

**A**

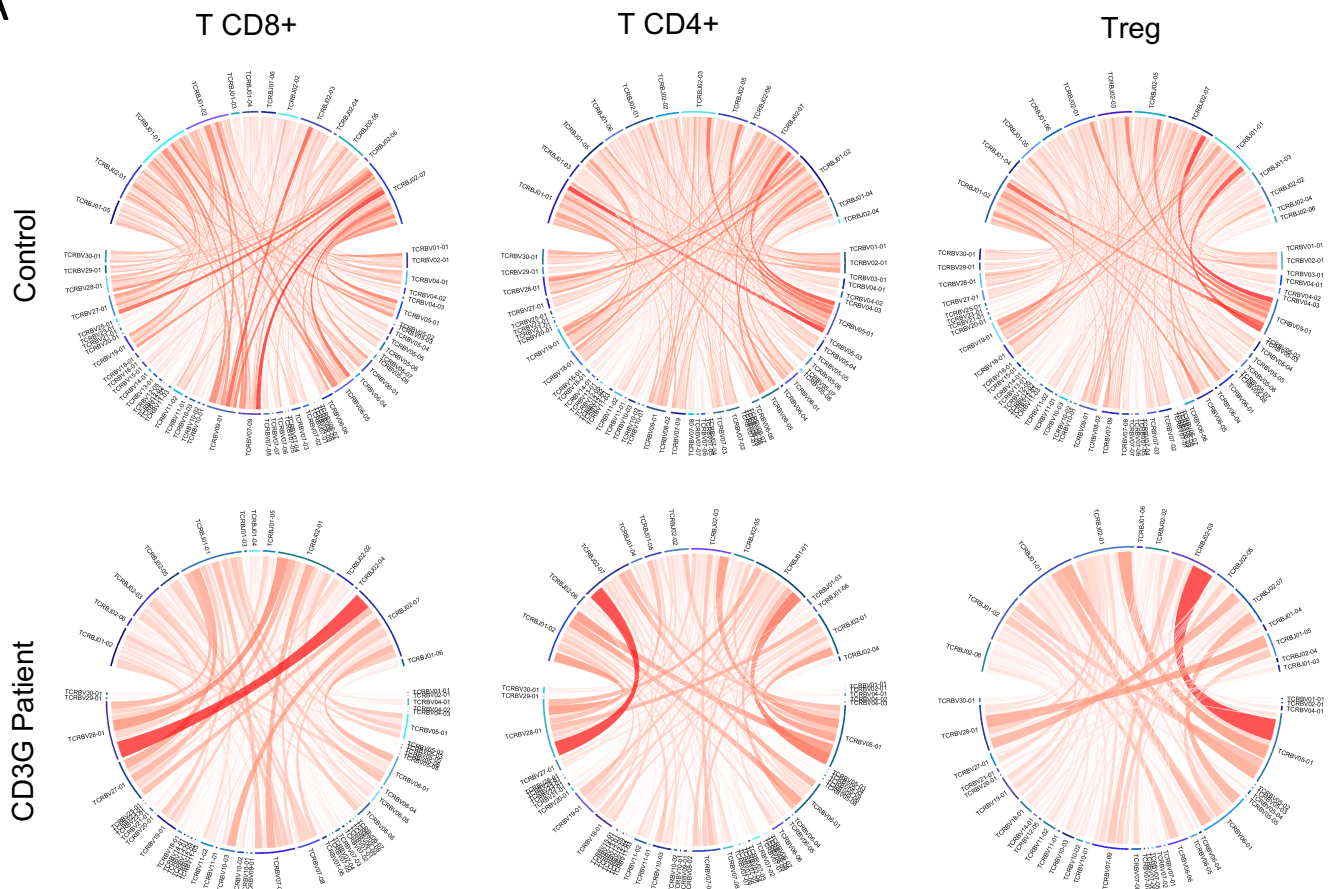

**B**

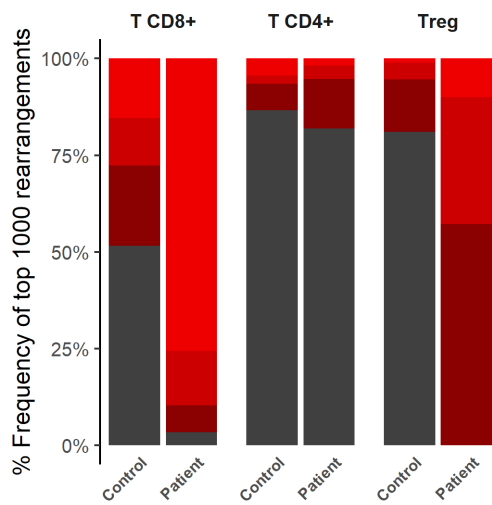

**C**

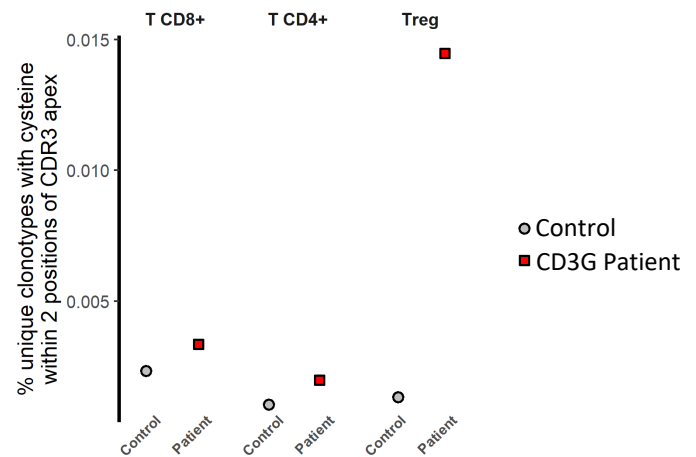

Supplementary Fig. 1

Supplement: NIHMS1727107-supplement-Supplementary_Figure.pdf [file NIHMS1727107-supplement-Supplementary_Figure.pdf]
